# Supplementary material for: Quantitative Proteomics of Medium-Sized Extracellular Vesicle-Enriched Plasma of Lacunar Infarction for the Discovery of Prognostic Biomarkers
Source: Int J Mol Sci. 2022 Oct 1;23(19):11670. doi: 10.3390/ijms231911670 (PMC9569577; doi:10.3390/ijms231911670)
Supplement: Supplementary file 1 [file ijms-23-11670-s001.zip]

Archive with 6 entries (6 files):
- SI_Revised_Final.pdf
- Supplemental Table S1.xlsx
- Supplemental Table S2.xlsx
- Supplemental Table S3.xlsx
- Supplemental Table S4.xlsx
- Supplemental Table S5.xlsx
