# Supplementary material for: Quantitative Proteomics of Medium-Sized Extracellular Vesicle-Enriched Plasma of Lacunar Infarction for the Discovery of Prognostic Biomarkers
Source: Int J Mol Sci. 2022 Oct 1;23(19):11670. doi: 10.3390/ijms231911670 (PMC9569577; doi:10.3390/ijms231911670)
Supplement: Supplementary file 1 [file ijms-23-11670-s001.zip › Supplemental Table S1.xlsx]

## Sheet: Supplemental Table S1
Supplemental Table S1. Protein content-based MEV charecterization as per MISEV2018 guidelines
Gene Symbol	Accession	Protein Name	Identification Parameters			Category	Category Details
			Unused	%Cov(95)	Peptides (95%)
ITGB3	P05106	Integrin beta-3	32.84	22.84	21	1a	non-tissue specific, Integrins
TFRC	P02786	Transferrin receptor protein 1	19.52	14.21	9	1a	non-tissue specific, transferrin receptor
ITGA6	P23229	Integrin alpha-6	19.19	10.27	11	1a	non-tissue specific, Integrins
ITGB1	P05556	Integrin beta-1	18.1	13.28	10	1a	non-tissue specific, Integrins
ITGA2	P17301	Integrin alpha-2	16.59	8.383	8	1a	non-tissue specific, Integrins
HLA-A	P01891	HLA class I histocompatibility antigen, A-68 alpha chain	12.44	20.27	5	1a	non-tissue specific, MHC class I
ITGAM	P11215	Integrin alpha-M	7.98	4.08	4	1a	non-tissue specific, Integrins
GNAQ	P50148	Guanine nucleotide-binding protein G(q) subunit alpha	6.11	10.58	3	1a	non-tissue specific, Heterotrimeric G proteins
HLA-B	P03989	HLA class I histocompatibility antigen, B-27 alpha chain	6.07	16.3	4	1a	non-tissue specific, MHC class I
GNAS	Q5JWF2	Guanine nucleotide-binding protein G(s) subunit alpha isoforms XLas	4.69	2.604	2	1a	non-tissue specific, Heterotrimeric G proteins
ITGB2	P05107	Integrin beta-2	4.2	3.641	2	1a	non-tissue specific, Integrins
ITGAL	P20701-2	Isoform 2 of Integrin alpha-L	3.06	1.554	1	1a	non-tissue specific, Integrins
GNAI2	P04899-4	Isoform sGi2 of Guanine nucleotide-binding protein G(i) subunit alpha-2	2.48	7.104	2	1a	non-tissue specific, Heterotrimeric G proteins
GNAZ	P19086	Guanine nucleotide-binding protein G(z) subunit alpha	2.05	4.225	1	1a	non-tissue specific, Heterotrimeric G proteins
HLA-A	P10314	HLA class I histocompatibility antigen, A-32 alpha chain	2.04	21.37	5	1a	non-tissue specific, MHC class I
LAMP1	P11279	Lysosome-associated membrane glycoprotein 1	2.01	2.638	1	1a	non-tissue specific
BSG	P35613	Basigin	1.7	3.636	1	1a	non-tissue specific, EMMPRIN
ITGA2B	P08514	Integrin alpha-2b, CD41	74.42	35.23	71	1b	cell/tissue specific, platelets
PECAM1	P16284-6	Isoform Delta15 of Platelet endothelial cell adhesion molecule	11.6	10.04	5	1b	cell/tissue specific, endothelial cells
GYPA	A0A087WU29	Glycophorin	4.03	20.95	3	1b	cell/tissue specific, RBC
CD9	P21926	CD9 antigen	2	4.386	1	1b	cell/tissue specific - tetraspanins
HSPA8	P11142	Heat shock cognate 71 kDa protein	26.45	24.15	13	2a	with lipid or membrane protein-binding ability
FLOT2	E7EMK3	Flotillin-2	14.19	18.01	7	2a	with lipid or membrane protein-binding ability
EHD1	A0A024R571	EH domain-containing protein 1	10.12	5.657	4	2a	with lipid or membrane protein-binding ability
FLOT1	O75955	Flotillin-1	6.37	10.3	4	2a	with lipid or membrane protein-binding ability
ANXA2	P07355-2	Isoform 2 of Annexin A2	6.31	11.48	3	2a	with lipid or membrane protein-binding ability
ANXA1	P04083	Annexin A1	5.98	7.514	2	2a	with lipid or membrane protein-binding ability
ANXA7	P20073	Annexin A7	2.01	1.639	1	2a	with lipid or membrane protein-binding ability
TUBB	P07437	Tubulin beta chain	44.06	50.9	32	2b	promiscuous incorporation in EVs (and possibly exomeres), cytoskeleton
TUBA4A	P68366	Tubulin alpha-4A chain	37.53	55.13	29	2b	promiscuous incorporation in EVs (and possibly exomeres), cytoskeleton
TUBB1	Q9H4B7	Tubulin beta-1 chain	31.02	60.53	32	2b	promiscuous incorporation in EVs (and possibly exomeres), cytoskeleton
GAPDH	P04406	Glyceraldehyde-3-phosphate dehydrogenase	22.76	39.1	15	2b	promiscuous incorporation in EVs (and possibly exomeres), enzymes
ACTR3	P61158	Actin-related protein 3	10.91	16.99	5	2b	promiscuous incorporation in EVs (and possibly exomeres), cytoskeleton
TUBA1C	A0A1W2PQM2	Tubulin alpha-1C chain	10.08	45.54	15	2b	promiscuous incorporation in EVs (and possibly exomeres), cytoskeleton
GAPDHS	O14556	Glyceraldehyde-3-phosphate dehydrogenase, testis-specific	8.95	13.24	13	2b	promiscuous incorporation in EVs (and possibly exomeres), enzymes
TUBA8	C9J2C0	Tubulin alpha chain (Fragment)	7.78	40.26	21	2b	promiscuous incorporation in EVs (and possibly exomeres), cytoskeleton
TUBB4B	P68371	Tubulin beta-4B chain	4.58	44.72	29	2b	promiscuous incorporation in EVs (and possibly exomeres), cytoskeleton
ACTR2	P61160-2	Isoform 2 of Actin-related protein 2	2.34	3.509	1	2b	promiscuous incorporation in EVs (and possibly exomeres), cytoskeleton
APOB	P04114	Apolipoprotein B-100	971.07	71.4	1070	3a	lipoproteins (produced by liver, abundant in plasma, serum)
ALB	P02768	Serum albumin	258.37	85.55	399	3a	lipoproteins (produced by liver, abundant in plasma, serum)
APOA1	P02647	Apolipoprotein A-I	39.17	56.93	23	3a	lipoproteins (produced by liver, abundant in plasma, serum)
APOA2	V9GYM3	Apolipoprotein A-II	3.41	8.271	2	3a	lipoproteins (produced by liver, abundant in plasma, serum)
HIST1H4A	P62805	Histone H4	6.89	26.21	3	4a	nucleus, Histones
HIST1H3D	A0A0U1RRH7	Histone H2A	4.3	16.47	2	4a	nucleus, Histones
HIST1H2BA	Q96A08	Histone H2B type 1-A	2.29	7.087	1	4a	nucleus, Histones
CYCS	C9JFR7	Cytochrome c (Fragment)	2.01	7.921	1	4b	mitochondria, Cytochrome C
HSPA5	P11021	78 kDa glucose-regulated protein	15.93	16.67	8	4c	secretory pathway (endoplasmic reticulum, Golgi apparatus)
HSP90B1	P14625	Endoplasmin	13.35	9.215	6	4c	secretory pathway (endoplasmic reticulum, Golgi apparatus)
CANX	P27824-2	Isoform 2 of Calnexin	8.3	7.974	4	4c	secretory pathway (endoplasmic reticulum, Golgi apparatus)
ACTN1	P12814-3	Isoform 3 of Alpha-actinin-1	68.44	42.12	45	4d	others (autophagosomes, cytoskeleton…)
ACTN4	O43707	Alpha-actinin-4	2.24	16.03	14	4d	others (autophagosomes, cytoskeleton…)
TGFB1	P01137	Transforming growth factor beta-1	2.13	4.872	2	5a	Cytokines and growth factors
FN1	P02751-15	Isoform 15 of Fibronectin	101.63	27.53	67	5b	adhesion and extracellular matrix proteins
LGALS3BP	Q08380	Galectin-3-binding protein	35.85	34.36	23	5b	adhesion and extracellular matrix proteins
CD5L	O43866	CD5 antigen-like	25.62	41.21	16	5b	adhesion and extracellular matrix proteins
COL6A3	P12111	Collagen alpha-3(VI) chain	3.17	0.4721	1	5b	adhesion and extracellular matrix proteins
MFGE8	Q08431	Lactadherin	2.03	2.584	1	5b	adhesion and extracellular matrix proteins
