# Supplementary material for: Quantitative Proteomics of Medium-Sized Extracellular Vesicle-Enriched Plasma of Lacunar Infarction for the Discovery of Prognostic Biomarkers
Source: Int J Mol Sci. 2022 Oct 1;23(19):11670. doi: 10.3390/ijms231911670 (PMC9569577; doi:10.3390/ijms231911670)
Supplement: Supplementary file 1 [file ijms-23-11670-s001.zip › Supplemental Table S2.xlsx]

## Sheet: Supplemental Table S2
Supplemental Table S2. Comparative list of EV markers detected in common between MEV and SEV fractions
Gene Symbol	Accession	MISEV Category	Category Details (in MISEV2018 Guidelines)	Protein Name	MEV									SEV
					Protein Score	%Cov(95)	Peptides (95%)	Log2(NAO/HC)	P-Value	Log2(RVE/HC)	P-Value	Log2(CD/HC)	P-Value	Protein Score	%Cov(95)	Peptides (95%)	Log2(NAO/HC)	P-Value	Log2(RVE/HC)	P-Value	Log2(CD/HC)	P-Value
TFRC	P02786	1a	non-tissue specific, transferrin receptor	Transferrin receptor protein 1	19.52	14.21	9	-1.76727	0.00155654	-0.265754	0.298273	0.0132879	0.869939	8.29	6.184	5	0.438495	0.0610168	0.199316	0.635806	0.0398632	0.881246
ITGA2B	P08514	1b	cell/tissue specific, platelets	Integrin alpha-IIb	74.42	35.23	71	-0.597947	7.52996e-05	-1.74069	2.66454e-15	-1.8337	1.11022e-15	13.72	7.988	6	0.159453	0.852762	1.08959	0.00881551	0.504933	0.211443
CD9	P21926	1b	cell/tissue specific - tetraspanins	CD9 antigen	2	4.386	1	-0.797263	0.398895	-0.983291	0.337025	-0.890277	0.364624	2	4.386	1	-0.504933	0.534577	-0.239179	0.776816	-0.425207	0.611273
TUBA4A	P68366	2b	promiscuous incorporation in EVs (and possibly exomeres), cytoskeleton	Tubulin alpha-4A chain	37.53	55.13	29	-0.93014	0.151439	-2.93658	0.0119817	-3.82686	0.00975628	1.81	5.134	2	-0.318905	0.706168	-0.0132877	0.980502	-0.385344	0.603979
TUBB1	Q9H4B7	2b	promiscuous incorporation in EVs (and possibly exomeres), cytoskeleton	Tubulin beta-1 chain	31.02	60.53	32	-1.34206	7.67708e-05	-3.81357	2.10175e-09	-2.77713	1.45522e-08	4.8	5.543	3	-0.837126	0.226842	0.279042	0.743579	0.265754	0.882556
GAPDH	P04406	2b	promiscuous incorporation in EVs (and possibly exomeres), enzymes	Glyceraldehyde-3-phosphate dehydrogenase	22.76	39.1	15	-1.43507	0.00127987	-2.13932	9.67592e-05	-1.43507	0.00116881	5.3	8.657	2	-0.093014	0.799803	0.093014	0.90959	-0.0531508	0.914906
GAPDHS	O14556	2b	promiscuous incorporation in EVs (and possibly exomeres), enzymes	Glyceraldehyde-3-phosphate dehydrogenase, testis-specific	8.95	13.24	13	0.0930139	0.877206	0.106301	0.821854	0.079727	0.977165	3.78	4.657	3	-0.385344	0.618338	-0.451782	0.431433	-0.265754	0.688336
ALB	P02768	3a	lipoproteins (produced by liver, abundant in plasma, serum)	Serum albumin	258.37	85.55	399	1.20918	0.000192568	-2.75056	0.000475542	0.0531503	0.486735	226.58	83.74	433	0.212603	0.220065	-2.85686	1.67205e-08	-3.05617	2.21694e-07
APOA1	P02647	3a	lipoproteins (produced by liver, abundant in plasma, serum)	Apolipoprotein A-I	39.17	56.93	23	-0.797263	0.341913	-1.39521	0.0174093	0.956715	0.00501477	45.26	68.91	30	-0.372056	0.117773	-1.58124	6.43762e-06	-0.93014	0.00259335
HIST1H4A	P62805	4a	nucleus, Histones	Histone H4	6.89	26.21	3	-2.51138	0.0203111	-1.71411	0.0445677	-1.23576	0.0769709	5.2	19.42	3	-0.265754	0.314031	-0.29233	0.281267	-0.345481	0.307277
HIST1H2BA	Q96A08	4a	nucleus, Histones	Histone H2B type 1-A	2.29	7.087	1	-1.46165	0.249625	-0.770687	0.423785	-0.597947	0.500823	1.45	0	0	-0.664386	0.458934	-0.239179	0.764596	-0.504933	0.547848
CD5L	O43866	5b	adhesion and extracellular matrix proteins	CD5 antigen-like	25.62	41.21	16	-0.690961	0.0345742	0.744112	0.0206731	1.99316	6.99407e-07	35.16	47.26	28	-1.11617	0.00188132	-0.225891	0.191465	0.0531508	0.99957
LGALS3BP	Q08380	5b	adhesion and extracellular matrix proteins	Galectin-3-binding protein	35.85	34.36	23	-1.11617	0.000782075	1.10288	0.00113959	2.03302	1.90522e-07	41.93	34.53	44	-1.7274	0.00139099	-1.96658	0.00127269	-0.358768	0.228797
COL6A3	P12111	5b	adhesion and extracellular matrix proteins	Collagen alpha-3(VI) chain	3.17	0.4721	1	-0.186028	0.666261	0.411919	0.441838	0.46507	0.4102	6.68	0.8184	2	0.332193	0.81177	0.916852	0.272073	1.0763	0.274933
