# Supplementary material for: Quantitative Proteomics of Medium-Sized Extracellular Vesicle-Enriched Plasma of Lacunar Infarction for the Discovery of Prognostic Biomarkers
Source: Int J Mol Sci. 2022 Oct 1;23(19):11670. doi: 10.3390/ijms231911670 (PMC9569577; doi:10.3390/ijms231911670)
Supplement: Supplementary file 1 [file ijms-23-11670-s001.zip › Supplemental Table S3.xlsx]

## Sheet: Supplemental Table S3
Supplemental Table S3. Number of aberrantly altered proteins in various outcome groups based on different filtering criteria
p-value	Fold Change	Number of Altered Proteins			% Total Proteome			AO/NAO*
		NAO/HC (115:114)	RVE/HC (116:114)	CD/HC (117:114)	NAO/HC (115:114)	RVE/HC (116:114)	CD/HC (117:114)
0.1	1.5	93	151	135	16.2304	26.3525	23.5602	1.53763
0.05	1.5	69	122	112	12.0419	21.2914	19.5462	1.69565
0.025	1.5	54	101	89	9.42408	17.6265	15.5323	1.75926
0.01	1.5	44	84	73	7.67888	14.6597	12.74	1.78409
0.005	1.5	37	76	66	6.45724	13.2635	11.5183	1.91892
0.1	2	52	138	130	9.07504	24.0838	22.6876	2.57692
0.05	2	39	115	108	6.80628	20.0698	18.8482	2.85897
0.025	2	35	95	85	6.1082	16.5794	14.8342	2.57143
0.01	2	28	82	72	4.88656	14.3106	12.5654	2.75
0.005	2	26	75	66	4.53752	13.089	11.5183	2.71154
0.1	2.5	29	124	116	5.06108	21.6405	20.2443	4.13793
0.05	2.5	21	106	99	3.66492	18.4991	17.2775	4.88095
0.025	2.5	20	88	80	3.4904	15.3578	13.9616	4.2
0.01	2.5	16	77	69	2.79232	13.438	12.0419	4.5625
0.005	2.5	16	70	63	2.79232	12.2164	10.9948	4.15625
* AO denotes average of RVE and CD groups
The highlighted row denotes the selected filters used in the current study (referred to Figure 3)
Column I shows that the number of altered proteins are higher in adverse outcome groups and the trend becomes more apparent with an increase in the stringency of the data filtering criteria.
NAO	No adverese outcome
RVE	Recurrent vascular event
CD	Cognitive decline
AO	Adverse outcome
