# Supplementary material for: Quantitative Proteomics of Medium-Sized Extracellular Vesicle-Enriched Plasma of Lacunar Infarction for the Discovery of Prognostic Biomarkers
Source: Int J Mol Sci. 2022 Oct 1;23(19):11670. doi: 10.3390/ijms231911670 (PMC9569577; doi:10.3390/ijms231911670)
Supplement: Supplementary file 1 [file ijms-23-11670-s001.zip › Supplemental Table S4.xlsx]

## Sheet: Supplemental Table S4
Supplemental Table S4. Proteome-wide correlation analysis in between three different LACI outcome groups*
Full List, n = 573		Full List
		NAO	RVE	CD
Spearman’s rho, ρ	NAO	1	0.6	0.63
	RVE	0.6	1	0.86
	CD	0.63	0.86	1
		Altered Proteome, n = 146
		NAO	RVE	CD
Spearman’s rho, ρ	NAO	1	0.38	0.51
	RVE	0.38	1	0.73
	CD	0.51	0.73	1
		LACI-induced, n = 51
		NAO	RVE	CD
Spearman’s rho, ρ	NAO	1	0.5	0.41
	RVE	0.5	1	0.8
	CD	0.41	0.8	1
		Outcome-dependent, n = 43
		NAO	RVE	CD
Spearman’s rho, ρ	NAO	1	0.58	0.6
	RVE	0.58	1	0.71
	CD	0.6	0.71	1
*All correlations were statistically significant.
