# Supplementary material for: Quantitative Proteomics of Medium-Sized Extracellular Vesicle-Enriched Plasma of Lacunar Infarction for the Discovery of Prognostic Biomarkers
Source: Int J Mol Sci. 2022 Oct 1;23(19):11670. doi: 10.3390/ijms231911670 (PMC9569577; doi:10.3390/ijms231911670)
Supplement: Supplementary file 1 [file ijms-23-11670-s001.zip › Supplemental Table S5.xlsx]

## Sheet: Supplemental Table S5
Supplemental Table S5. Summary of Chi-square analysis results based on GO-terms
Sl.No.	GO Category¶	GO-term	Group Name	Deregulated Proteome (n/tot; %tot) [n =146]	Unchanged Proteome (n/tot; %tot) [n = 423]	Chi Square Statistic	Chi Square p Value
1	CC	Vesicle, endosome, lysosome, autophagosome, secretory	Vesicle-associated	53/146, 36%	96/423, 23%	10.4	0.001
2	BP	Inflammation, inflammatory, Immuno, Immune	Inflammation-associated	28/146, 19%	68/423, 16%	0.69	>.05
3	BP	Coagulation, fibrin, clot, fibrinolysis, aggregation	Coagulation-associated	34/146, 23%	40/423, 9%	18.35	<.001
4	BP	Vasculature, vascular, endothelial, endothelium	Vasculature-associated	21/146, 14%	31/423, 7%	6.5	0.011
5	CC	Brain-associated*	Brain-associated	24/146, 16%	86/423, 20%	1.05	>.05
6	BP	Oxygen glucose deprivation, hypoxia	OGD-associated	13/146, 9%	13/423, 4%	8.46	0.004
7	BP	Amyloid	Amyloid-associated	7/146, 5%	8/423, 2%	3.56	>.05
8	MF	Antioxidant, peroxidase, dismutase, oxidase, oxidoreductase	ROS-associated	10/146, 7%	17/423, 4%	1.92	>.05
¶ GO category: CC, cellular component; BP, biological process; MF, molecular function. *glutamatergic synapse, synapse, axon, dendritic spine, neuronal cell body, dendrite, dendrite cytoplasm, postsynaptic density, postsynaptic membrane, axolemma, axon cytoplasm, axon terminus, dendritic shaft, glial cell projection, growth cone, myelin sheath, myelin sheath abaxonal region, neuron projection, po…
